1 **CLINICAL CHARACTERISTICS AND PROGNOSTIC FACTORS**  
2 **FOR ICU ADMISSION OF PATIENTS WITH COVID-19 USING**  
3 **MACHINE LEARNING AND NATURAL LANGUAGE PROCESSING**

4  
5  
6 **Jose L. Izquierdo<sup>1,2</sup>, Julio Ancochea<sup>3,4,5</sup>, Savana COVID-19 Research**  
7 **Group\*, and Joan B. Soriano<sup>3,4,5</sup> (ORCID 0000-0001-9740-2994)**  
8

9 <sup>1</sup> Universidad de Alcalá, Madrid

10 <sup>2</sup> Hospital Universitario de Guadalajara, Guadalajara

11 <sup>3</sup> Hospital Universitario de La Princesa, Madrid

12 <sup>4</sup> Universidad Autónoma de Madrid, Madrid

13 <sup>5</sup> Centro de Investigación en Red de Enfermedades Respiratorias (CIBERES),  
14 Instituto de Salud Carlos III (ISCIII), Madrid; all in Spain

15  
16 \*Savana COVID-19 Research Group are: Ignacio H. Medrano, MD; Jorge Tello;  
17 Alberto Porras, MD, PhD; Marisa Serrano, PhD; Sara Lumbreras, PhD,  
18 Universidad Pontificia Comillas (ORCID: 0000-0002-5506-9027); Carlos Del  
19 Rio-Bermudez, PhD (ORCID: 0000-0002-1036-1673); Stephanie Marchesseau,  
20 PhD; Ignacio Salcedo; Andrea Martínez; Claudia Maté, MD; Sergio Collazo,  
21 MD; Jesús Barea, MD; María Villamayor, MD; Antonio Urda, MD, PhD; Carolina  
22 de la Pinta, MD; Imanol Zubizarreta; Yolanda González, PhD; Sebastian  
23 Menke, PhD (ORCID: 0000-0002-2588-6405).

24  
25 **Address for correspondence:**

26 Dr. Joan B Soriano, MD, PhD, FERS, FCCP  
27 Servicio de Neumología  
28 Hospital Universitario de la Princesa, UAM  
29 Diego de León 62, 28005-Madrid, Spain

30  
31 **Email:** [jbsoriano2@gmail.com](mailto:jbsoriano2@gmail.com)

32 **Cellular:** +34 618867769

33  
34 **Date:** May 5, 2020

35 **File name:** BigCOVIData paper\_MedRxiv.docx

36 **Word count:** 3,334 words

37 **Number of references:** 36 references

38 **Number of illustrations:** 4 figures and 2 tables; Supplementary Materials: 1 figure and  
39 1 table

40 **Running Title:** Big data and COVID-19

41 **Conflict of Interest:** Individual forms from all co-authors are appended

42 **Keywords:** artificial Intelligence, big data, COVID-19, electronic health records,  
43 tachypnoea, SARS-CoV-2

44 **ABSTRACT**

45

46 There remain many unknowns regarding the onset and clinical course of the ongoing  
47 COVID-19 pandemic. We used a combination of classic epidemiological methods,  
48 natural language processing (NLP), and machine learning (for predictive modeling), to  
49 analyse the electronic health records (EHRs) of patients with COVID-19.

50

51 We explored the unstructured free text in the EHRs within the SESCAM Healthcare  
52 Network (Castilla La-Mancha, Spain) from the entire population with available EHRs  
53 (1,364,924 patients) from January 1<sup>st</sup> to March 29<sup>th</sup>, 2020. We extracted related clinical  
54 information upon diagnosis, progression and outcome for all COVID-19 cases, focusing  
55 in those requiring ICU admission.

56

57 A total of 10,504 patients with a clinical or PCR-confirmed diagnosis of COVID-19 were  
58 identified, 52.5% males, with age of 58.2±19.7 years. Upon admission, the most  
59 common symptoms were cough, fever, and dyspnoea, but all in less than half of cases.  
60 Overall, 6% of hospitalized patients required ICU admission. Using a machine-learning,  
61 data-driven algorithm we identified that a combination of age, fever, and tachypnoea  
62 was the most parsimonious predictor of ICU admission: those younger than 56 years,  
63 without tachypnoea, and temperature <39°C, (or >39°C without respiratory crackles),  
64 were free of ICU admission. On the contrary, COVID-19 patients aged 40 to 79 years  
65 were likely to be admitted to the ICU if they had tachypnoea and delayed their visit to  
66 the ER after being seen in primary care.

67

68 Our results show that a combination of easily obtainable clinical variables (age, fever,  
69 and tachypnoea with/without respiratory crackles) predicts which COVID-19 patients  
70 require ICU admission.

71

72 **Abstract word count:** 249 words

73

74 **Funding:** This study was sponsored by SAVANA (<https://www.savanamed.com/>)

75

76

77 **INTRODUCTION**

78 The unprecedented, global spread of the severe acute respiratory syndrome  
79 coronavirus 2 (SARS-CoV-2) that causes coronavirus disease 2019 (COVID-19)  
80 requires innovative approaches that deliver immediate, real-time results[1, 2]. To date,  
81 big data technologies have only been used to estimate SARS-CoV-2 transmission[3],  
82 and to indirectly estimate COVID-19 cases in China by using social media[4]. However,  
83 there remain many unknowns regarding the onset and temporal distribution of the  
84 ongoing COVID-19 pandemic. Similarly, both the individual and population burden of  
85 COVID-19 are just beginning to be unravelled. To the best of our knowledge, such  
86 tools[5-7] have not been used to explore the clinical characteristics and prognostic  
87 factors of COVID-19[8].

88 Considering the unprecedented spread and severity of the ongoing COVID-19  
89 outbreak, focus has been set on hospital's unmet need, and in particular ICU  
90 requirements[8, 9]. Indeed, health systems have been/are near collapse and  
91 independent modelling efforts have aimed to forecast a number of epidemiological  
92 estimators, including ICU use [10-12].

93 Previously, our team reported that the combination of big data analytics and machine  
94 learning techniques helped to better determine quality of diagnosis and treatment of  
95 chronic obstructive pulmonary disease (COPD) via an analysis of hospital electronic  
96 health records (EHRs) using natural language processing (NLP) and validated  
97 algorithms[13, 14].

98 By means of The BigCOVIData study, we aimed to better determine the real-world  
99 epidemiology of COVID-19 infection in a well-defined population. Using a combination  
100 of classic epidemiological methods[15], NLP, and machine learning (for predictive  
101 modeling), we analysed the clinical information contained in the EHRs of patients with  
102 COVID-19 to advance our understanding of the disease and its associated outcomes,  
103 most notably ICU admission.

104

105 **METHODS**

106

107 The BigCOVIData study was conducted in compliance with legal and regulatory  
108 requirements and followed generally accepted research practices described in the ICH  
109 Guideline for Good Clinical Practice, the Helsinki Declaration in its latest edition, Good  
110 Pharmacoepidemiology Practices, and applicable local regulations. This study was  
111 classified as a 'non-post-authorization study' (EPA) by the Spanish Agency of  
112 Medicines and Health Products (AEMPS), and it was approved by the Research Ethics  
113 Committee at the University Hospital of Guadalajara (Spain). We have followed and  
114 endorsed the STrengthening the Reporting of OBServational studies in Epidemiology  
115 (STROBE) guidance for reporting observational research[16].

116 ***Study design and data source***

117 This was a multicenter, non-interventional, retrospective study using data captured in  
118 the EHRs of the participating hospitals within the SESCOAM Healthcare Network in  
119 Castilla-La Mancha, Spain (**Figure 1**). Data captured in the EHRs was collected from  
120 all available departments, including inpatient hospital, outpatient hospital, and ER, for

121 virtually all types of provided services in each participating hospital. The study period  
122 was January 1, 2020 – March 29, 2020.

123 The study database was fully anonymized in a structured format and contained no  
124 personal information from patients. Likewise, personal information was not accessed  
125 during either the application of automated and algorithmic methods (i.e., NLP) or during  
126 the conversion of unstructured data into the structured database. Importantly, given  
127 that clinical information was handled in an aggregate, anonymized, and irreversibly  
128 dissociated manner, patient consent regulations do not apply to the present study

### 129 ***Study sample***

130 The study sample included all patients in the source population diagnosed with COVID-  
131 19. Patients were identified on the basis of clinical diagnosis (i.e., COVID-19 cases  
132 determined by observed symptomatology, imaging (mostly chest X-ray) and laboratory  
133 results, as captured in the unstructured, free-text information in the EHRs) and/or  
134 microbiological test results (i.e., COVID-19 cases confirmed by RT-PCR or similar  
135 available tests). Our decision to consider both PCR- and clinically confirmed cases is  
136 justified by the limited availability of routinely administered RT-PCR tests in the region  
137 during the study period and supported by recent discussions on the far-from-optimal  
138 sensitivity of RT-PCR for COVID19 (i.e., a single negative result from a single  
139 specimen cannot exclude the disease in suspected cases)[17, 18]. Indeed, recent  
140 reports highlight the clinical validity and relatively high sensitivity of symptom- and  
141 imaging-based identification of COVID-19 patients, especially in early stages of the  
142 disease[17, 19, 20].

### 143 ***EHRead<sup>®</sup>***

144 To meet the study objectives, we used *EHRead<sup>®</sup>*[21], a technology developed by  
145 SAVANA that applies NLP, machine learning, and deep learning to analyse the  
146 unstructured free-text information written in millions of de-identified EHRs. This  
147 technology enables the extraction of information from all types of EHRs and the  
148 subsequent normalization of extracted clinical entities to a unique terminology. This  
149 process allows for further analysis of descriptive or predictive nature. Originally based  
150 on SNOMED CT terminology, our unique body of terminology comprises more than  
151 400,000 medical concepts, acronyms, and laboratory parameters aggregated over the  
152 course of five years of free-text mining, targeting the most common diseases (e.g.  
153 respiratory diseases, cardiovascular diseases, and diabetes, among others).

154 Using a combination of regular expression (regex) rules and machine learning models,  
155 the terminology entities are detected in the unstructured text and later classified based  
156 on sections typically contained in the EHRs, hospital services, and other clinical  
157 specifications. Importantly, each detected term is described in terms of negative,  
158 speculative, or affirmative clinical statements; this is achieved by using deep learning  
159 CNN classification methods that rely on word embeddings and context information (for  
160 a similar methodological approach, see [22]). Limitations in a case by case detection  
161 are also overcome with a similar approach to ensure that the detected concepts are  
162 used within the appropriate context for the descriptive and predictive analysis.

163 For particular cases where extra specifications are required (i.e., to differentiate  
164 COVID cases from other mentions of the term related to fear of the disease or to  
165 potential contact), the detection output was manually reviewed in more than 5000  
166 reports to avoid any possible ambiguity associated with free-text reporting. All NLP  
167 deep learning models used in this study were validated using the standard

168 training/validation/testing approach; we used a 75/12/13 split ratio in the available  
169 annotated data (between 2,000 and 3,000 records, depending on the model) to ensure  
170 efficient generalization on unseen cases. For all developed models, we obtained F-  
171 scores greater than 0.89.

## 172 **Data Analyses**

173 All categorical variables (e.g., comorbidities, symptoms) are shown in frequency tables,  
174 whereas continuous variables (e.g., age) are described via summary tables that include  
175 the mean, standard deviation, median, minimum, maximum, and quartiles of each  
176 variable. The number of missing data points for each variable is provided, if any. To  
177 test for possible statistically significant differences in the distribution of categorical  
178 variables between study groups (i.e., male vs. female, ICU admission vs. No ICU  
179 admission), we used Yates-corrected  $\chi^2$  tests. For continuous variables, mean  
180 differences were tested using t-tests. Given our general population approach, and our  
181 larger than usual sample size, we were interested in exploring sex-related differences  
182 in COVID-19 patients, so most results are stratified by sex[23]. All statistical inferences  
183 were performed at the 5% significance level using 2-sided tests or 2-sided CIs.

## 184 **Predictive model**

185 We developed a decision tree to classify COVID-19 patients according to their risk of  
186 being admitted to the ICU. The two types of patients or *classes* considered in the  
187 model were therefore "admitted to the ICU" and "not admitted to the ICU". The model  
188 maps the characteristics of patients (the *variables*) to their class in the shape of a tree.  
189 From a clinical perspective, this model contemplates all patient variables upon  
190 admission, meaning that its predictive value is so from symptom debut until outcome.  
191 The tree is composed of nodes that branch to subsequent children nodes depending  
192 on the patient's variables. The tree is built in such a way that each branch separates  
193 the two classes as much as possible. This separation is measured as *Shannon*  
194 *entropy*, where a node with an entropy of zero means that the classification is perfect  
195 (either all or none of the patients were admitted to the ICU) and an entropy of one is  
196 the worst possible mix (50%/50%)[24].

197 *Model training and validation.* The model was developed and tested on the available  
198 data from hospitalized patients that had either been admitted to the ICU or not; the  
199 latter were either discharged from the hospital or died in the course of the disease. This  
200 amounted to a total of 900 patients. Our algorithm was validated in a split of our  
201 COVID-19 sample, in a 70% training set and a 30% validation set. This means that the  
202 model was trained with 630 patients (582 who did not require intensive care, vs 48 who  
203 did) and validated over the remaining 270 patients. Because the two classes were  
204 unbalanced (far fewer patients require ICU), we used the standard technique of  
205 oversampling the lower class to guarantee a balance of accuracy and recall (in other  
206 words, the tradeoff between false positives vs. false negatives). Further, we sought to  
207 replicate the results from this validation in a *posteriori* sensitivity analysis, as per recent  
208 recommendations for predictive modeling in COVID-19[25] and TRIPOD guidance[26].  
209 For this second validation, we trained the model with data from the provinces of Ciudad  
210 Real and Guadalajara (38% of the study sample from Castilla La-Mancha), and used  
211 an independent set with combined data set from the other three provinces, namely  
212 Toledo, Cuenca, and Albacete for validation.

213

## 214 **RESULTS**

215

216 From a source general population of 2,035,000 inhabitants, we used NLP and machine  
217 learning to analyse the clinical information contained in the EHRs of 1,364,924  
218 anonymous patients (**Figure 1**). Among these, we identified a total of 10,504 patients  
219 diagnosed with COVID-19 (**Figure 2**). The flowchart of participation in the study up to  
220 hospital admission, ICU admission, or discharge is presented in **Figure 2**.

221 COVID-19 patients were 52.5% males, with a mean $\pm$ SD age of 58.2 $\pm$ 19.7 years,  
222 (**Table 1**). Most COVID-19 patients were 50 years and older (**Figure 3**). Upon  
223 diagnosis, the most common symptoms reported were cough, fever and dyspnoea  
224 (**Table 1**); notably, less than half of patients presented with these symptoms, probably  
225 due to the fact that most were attended in primary care. Further, respiratory crackles,  
226 myalgia, and diarrhoea were identified in 5% or more of cases, while other respiratory  
227 and non-respiratory signs and symptoms were less common. Sex-dependent  
228 differences in sign and symptom frequencies upon diagnosis are shown in **Table 1**. Of  
229 note, we observed subtle increases in frequency of diarrhoea, myalgia, headache,  
230 chest pain, and anosmia in female COVID-19 patients, while men showed significant  
231 increases in fever, dyspnoea, respiratory crackles, ronchus, lymphopenia, and  
232 tachypnoea (all  $p < 0.05$ ).

233 Similarly, the most frequent comorbidities were cardiovascular disease (48.2% of  
234 patients) -mainly arterial hypertension (33.6%) and heart disease (25.1%)- and  
235 diabetes (15.7%) (**Table 1**). Regarding respiratory diseases, COPD was present in  
236 6.4%, asthma in 7.2%, OSA in 2%, and bronchiectasis in 1.2% of patients. Sex-  
237 dependent differences in comorbidities upon diagnosis are also shown in **Table 1**;  
238 except for asthma, the frequency of all comorbidities was significantly higher in male  
239 than female COVID-19 patients (all  $p < 0.05$ ).

240 Next, we explored whether the distribution of comorbidities and sign/symptoms  
241 captured in the patients' EHRs upon diagnosis differed between those COVID-19  
242 patients who were admitted to the ICU vs. those who were not (**Table 2**). Regarding  
243 comorbidities, diabetes, obesity, cardiovascular disease (mainly hypertension), heart  
244 disease (mainly ischemic heart disease), and renal dysfunction were more common  
245 among those patients who were admitted to the ICU (all  $p < 0.01$ ). As for signs and  
246 symptoms, cough, fever, dyspnoea, respiratory crackles, diarrhoea, tachypnoea,  
247 lymphopenia, and rhonchus were more frequent among ICU patients (all  $p < 0.05$ ).  
248 Interestingly, respiratory diseases were not more frequent among patients who were  
249 admitted to the ICU (**Table 2**).

250 Finally, by using a machine-learning, data-driven algorithm, we identified that the  
251 combination of three easily available clinical variables, namely age, temperature, and  
252 respiratory frequency, was the most parsimonious predictor of ICU admission among  
253 COVID-19 patients (**Figure 4**). For this model, age and temperature were captured as  
254 continuous variables, whereas tachypnoea (yes/no) was defined as respiratory  
255 frequency of more than 20 breaths per minute. With accuracy, recall, and AUC values  
256 of 0.68, 0.71, and 0.76, respectively, the presented model reached optimal balance in  
257 terms of positive and negative predictive value for ICU admission. On the one hand,  
258 those younger than 56 years, without tachypnoea, and with temperature  $< 39^{\circ}\text{C}/102^{\circ}\text{F}$   
259 (entropy = 0,  $n = 145$ ) (or  $> 39^{\circ}\text{C}/102^{\circ}\text{F}$  without respiratory crackles), were free of ICU  
260 admission, (entropy = 0,  $n = 18$ ). On the other hand, COVID-19 patients aged 40 to 70  
261 years were likely to be admitted in the ICU if they presented with tachypnoea and  
262 delayed their visit to the ER after being seen in primary care (entropy = 0,  $n = 104$ ). As  
263 stated in the Methods section, we performed an additional sensitivity analysis with

264 different data sets to further validate the results of our predictive model. The  
265 independent data set of two provinces (Ciudad Real and Guadalajara, including a total  
266 of 753,408 individual patients, or 38% of the entire study sample from Castilla-La  
267 Mancha; **Figure 1** and **Supplemental Table S1**), was used to retrain our algorithm to  
268 identify ICU admission at onset; validation was performed in the remaining three  
269 provinces. As shown in **Supplemental Figure S1**, the new decision tree identified the  
270 same relevant clinical variables, that is age, tachypnea, temperature, and respiratory  
271 crackles/ronchus with similar (but not identical) thresholds in some of them. This  
272 additional model reached values of accuracy, recall, and AUC of 0.85, 0.57, and 0.84,  
273 respectively, thus providing additional proof of validity for our main findings.

274

## 275 **DISCUSSION**

276 Recent technological advances allow for the optimal and rapid extraction, integration,  
277 and analysis of the unique and massive amount of untapped medical knowledge  
278 captured in the EHRs. This possibility is particularly meaningful when the clinical  
279 question at hand requires collecting data from a large number of patients in a very  
280 limited amount of time, as is the case with the newly described COVID-19 pandemic.

281 By anonymously accessing the clinical information of more than 10,000 anonymous  
282 patients with COVID-19 (a number that largely surpasses samples included in recent  
283 reports about the disease[27, 28]), we were able to describe their demographic and  
284 clinical characteristics, their clinical journey, and the statistical relationship between the  
285 most common symptoms and comorbidities on admission, and COVID-19 prognosis  
286 (i.e., ICU admission). There were subtle differences in clinical symptoms at onset by  
287 sex, while all comorbidities (but asthma) were significantly higher in male than female  
288 COVID-19 patients; these and other findings should be replicated in clinical series  
289 elsewhere.

290 The variables identified in our ICU admission model (i.e., age, temperature, and  
291 tachypnoea) are clinically relevant as they are readily available and easily observable  
292 in the everyday practice with COVID-19 patients. Although tachypnea is not an  
293 exclusive manifestation of COVID-19 and can be present in patients suffering from  
294 other respiratory diseases (i.e., pneumonia), our model suggests that this sign (in  
295 combination with age and temperature) is the most reliable predictor of ICU use over  
296 other common symptoms and signs such as cough, dyspnea, or respiratory crackles.

297

298 In addition, given that the stability and capacity of ICUs worldwide is threatened by the  
299 rapid spread of the disease, the identification of individual factors that predict ICU  
300 admission may not only improve patient management but also optimize healthcare  
301 resource use and planning.

302

303 Further applied to other national and international healthcare networks, the tools and  
304 methodology presented here can potentially characterize and predict the prognosis of  
305 COVID-19 in a timely and unprecedented manner. As recently pointed out[29, 30],  
306 there might be value in the application of artificial intelligence to the current COVID-19  
307 pandemic, not only to predict outbreaks[31] or read chest CT scans[32], but also to  
308 disentangle COVID-19's clinical onset and natural history in nearly real-time. Indeed,  
309 classical methods would have required months of questionnaire-based data collection  
310 and questionnaire validation, along with multiple Ethics Board approvals and other  
311 practical hurdles, all saved with our current approach.

312  
313 In the race against COVID-19[33], where the goal is to curb the pandemic, it is  
314 imperative to leverage big data and intelligent analytics for the betterment of public  
315 health. However, it is of the utmost importance not to neglect privacy and public trust,  
316 to keep best practices, and to maintain responsible standards for data collection and  
317 data processing at a global scale[34].

318

### 319 ***Strengths and Limitations***

320 To our knowledge, this is the first study using NLP and machine learning to access  
321 real-world data in such a large COVID-19 population. Indeed, our state-of-the-art  
322 methodology allowed for the rapid analysis of the unstructured free-text narratives in  
323 the EHRs of one million patients from the general population of the region of Castilla  
324 La-Mancha (Spain).

325 Our methodology combined modules for sentence segmentation, tokenization, text  
326 normalization, acronym disambiguation, negation detection, and a multi-dimensional  
327 ranking scheme; the latter involved linguistic knowledge, statistical evidence, and  
328 continuous vector representations of words and documents learned via shallow neural  
329 networks. When applied to EHRs, NLP enables *a*) access to entire track records for *all*  
330 patients in the target population, and *b*) the implementation of exploratory analysis to  
331 unravel associations between variables that have remained undetected with traditional  
332 research methods. By considering all possible patients with the target disease, the  
333 information and analyses used here (i.e., RWD and free-scale statistics) remained  
334 unbiased by the research question or the observers. Unlike classical statistical  
335 methods (e.g., logistic regression), the main advantage associated with the use of ML  
336 in this context is that it allows for the automatic detection of meaningful relationships  
337 between variables. For instance, if a given symptom (i.e., fever) is only relevant for  
338 certain patients (i.e., older than 50), techniques such as the classification trees used  
339 here are suitable to uncover this relationship. In this context, although the total number  
340 of patients that required ICU use in the training set was somewhat low (48 patients),  
341 the number of variables considered in the model was also very limited. In addition, the  
342 inclusion of a validation stage reduces the likelihood of overfitting. Ultimately, the use of  
343 classification trees in this study (as opposed to other models such as Artificial Neural  
344 Networks) is especially appropriate in the clinical context because they are easily  
345 interpretable.

346 Regarding the geographical location of our participating hospital sites, it is worth  
347 mentioning that with a total of 1,364,924 patients from the region of Castilla La-Mancha  
348 (SESCAM Healthcare Network), our sample is representative of the Spanish  
349 population; Spain has been among the hardest hit countries by the pandemic, in terms  
350 of both total cases and mortality rates [35, 36], and this region in particular is the third  
351 most affected in the country, just behind Madrid and Catalonia. For this reason, we  
352 anticipate that the clinical conclusions drawn here are relevant for clinicians worldwide.  
353 Of note, ICU capacity in the region during the study period was not compromised yet,  
354 which protects against possible bias in our training data (all patients requiring intensive  
355 care were indeed admitted to the ICU).

356 The results and conclusions of the present study should be interpreted in light of the  
357 following limitations. First, we did not distinguish COVID-19 cases confirmed by  
358 laboratory results (i.e., RT-PCR) from those exclusively diagnosed through clinical  
359 observation (i.e., symptomatology, imaging and laboratory results). However, it should



360 be noted that PCR and other rapid laboratory tests for the detection of SARS-CoV-2  
361 were not routinely administered in Spain during the study period. In addition, this  
362 decision is supported by recent discussions on the clinical validity and relatively high  
363 sensitivity of symptom- and imaging-based identification of COVID-19 patients,  
364 especially in early stages of the disease[17, 19, 20]. Second, independent replications  
365 by different research groups in larger patient sets are needed to further support the  
366 clinical validity of our results.

367 Finally, future reports from the BIGCOVIData study may incorporate laboratory results  
368 and treatments, and contextualize the results presented here in a larger clinical  
369 picture[25].

370 We conclude that, in the largest series of COVID-19 patients attended during the first  
371 three months of the pandemic in Spain, 6% of all hospitalized patients required ICU;  
372 and that a combination of easily obtained clinical variables, namely age, fever, and  
373 tachypnoea predicts which COVID-19 patients require ICU admission.

374

375 **Acknowledgments.** We thank all the Savaners for helping accelerate health science  
376 with their daily work. This would have not been possible without every single team  
377 member. We also thank SESCAM (Healthcare Network in Castilla-La Mancha, Spain)  
378 for its participation in the study and for supporting the development of cutting-edge  
379 technology in real time.

380 **REFERENCES**

- 381 1. Centers for Disease Control and Prevention (CDC). Coronavirus (COVID-19) at CDC & P.  
382 Available from <https://www.cdc.gov/coronavirus/2019-ncov/index.html>. Accessed April 8,  
383 2020
- 384 2. Zhu N, Zhang D, Wang W, Li X, Yang B, Song J, Zhao X, Huang B, Shi W, Lu R, Niu P,  
385 Zhan F, Ma X, Wang D, Xu W, Wu G, Gao GF, Tan W. A Novel Coronavirus from Patients with  
386 Pneumonia in China, 2019. *N Engl J Med* 2020: 382(8): 727-733.
- 387 3. Ferretti L, Wymant C, Kendall M, Zhao L, Nurtay A, Abeler-Dorner L, Parker M, Bonsall  
388 D, Fraser C. Quantifying SARS-CoV-2 transmission suggests epidemic control with digital  
389 contact tracing. *Science* 2020.
- 390 4. Qin L, Sun Q, Wang Y, Wu KF, Chen M, Shia BC, Wu SY. Prediction of Number of Cases  
391 of 2019 Novel Coronavirus (COVID-19) Using Social Media Search Index. *Int J Environ Res Public*  
392 *Health* 2020: 17(7).
- 393 5. Topol EJ. High-performance medicine: the convergence of human and artificial  
394 intelligence. *Nat Med* 2019: 25(1): 44-56.
- 395 6. Divita G, Carter M, Redd A, Zeng Q, Gupta K, Trautner B, Samore M, Gundlapalli A.  
396 Scaling-up NLP Pipelines to Process Large Corpora of Clinical Notes. *Methods Inf Med* 2015:  
397 54(6): 548-552.
- 398 7. Burgner D, Jamieson SE, Blackwell JM. Genetic susceptibility to infectious diseases: big  
399 is beautiful, but will bigger be even better? *Lancet Infect Dis* 2006: 6(10): 653-663.
- 400 8. Liu Y, Mao B, Liang S, Yang JW, Lu HW, Chai YH, Wang L, Zhang L, Li QH, Zhao L, He Y,  
401 Gu XL, Ji XB, Li L, Jie ZJ, Li Q, Li XY, Lu HZ, Zhang WH, Song YL, Qu JM, Xu JF. Association  
402 between ages and clinical characteristics and outcomes of coronavirus disease 2019. *Eur Respir*  
403 *J* 2020.
- 404 9. Horton R. Offline: COVID-19-what countries must do now. *The Lancet* 2020:  
405 395(10230): 1100.
- 406 10. Xu B, Gutierrez B, Mekar S, Sewalk K, Goodwin L, Loskill A, Cohn EL, Hsuen Y, Hill SC,  
407 Cobo MM, Zarebski AE, Li S, Wu C-H, Hulland E, Morgan JD, Wang L, O'Brien K, Scarpino  
408 Samuel V, Brownstein JS, Pybus OG, Pigott DM, Kraemer MUG. Epidemiological data from the  
409 COVID-19 outbreak, real-time case information. *Scientific Data* 2020: 7(1): 106.
- 410 11. Murray CJ. Forecasting COVID-19 impact on hospital bed-days, ICU-days, ventilator-  
411 days and deaths by US state in the next 4 months. *medRxiv* 2020: 2020.2003.2027.20043752.
- 412 12. Sotgiu G, GGCs, Miozzo M, Canonica GW, Virchow JC, Soriano JB. Advanced forecasting  
413 of SARS-CoV-2 related deaths in Italy, Germany and Spain. *Allergy* 2020: In Press.
- 414 13. Izquierdo JL, Morena D, Gonzalez Y, Paredero JM, Perez B, Graziani D, Gutierrez M,  
415 Rodriguez JM. Clinical Management of COPD in a Real-World Setting. A Big Data Analysis. *Arch*  
416 *Bronconeumol* 2020.
- 417 14. Sociedad Española de Neumología y Cirugía Torácica. Chart Review of Patients With  
418 COPD, Using Electronic Medical Records and Artificial Intelligence (BigCOPData). Available from  
419 <https://clinicaltrials.gov/ct2/show/NCT04206098>. Accessed April 13, 2020.
- 420 15. Koo D, Thacker SB. In snow's footsteps: Commentary on shoe-leather and applied  
421 epidemiology. *Am J Epidemiol* 2010: 172(6): 737-739.
- 422 16. STrengthening the Reporting of OBServational studies in Epidemiology (STROBE)  
423 guidance for reporting observational research. Available from [http://strobe-](http://strobe-statement.org/index.php?id=strobe-home)  
424 [statement.org/index.php?id=strobe-home](http://strobe-statement.org/index.php?id=strobe-home). Accessed April 13, 2020.
- 425 17. Long C, Xu H, Shen Q, Zhang X, Fan B, Wang C, Zeng B, Li Z, Li X, Li H. Diagnosis of the  
426 Coronavirus disease (COVID-19): rRT-PCR or CT? *Eur J Radiol* 2020: 126: 108961.
- 427 18. Wang W, Xu Y, Gao R, Lu R, Han K, Wu G, Tan W. Detection of SARS-CoV-2 in Different  
428 Types of Clinical Specimens. *JAMA* 2020.

- 429 19. Ai T, Yang Z, Hou H, Zhan C, Chen C, Lv W, Tao Q, Sun Z, Xia L. Correlation of Chest CT  
430 and RT-PCR Testing in Coronavirus Disease 2019 (COVID-19) in China: A Report of 1014 Cases.  
431 *Radiology*: 0(0): 200642.
- 432 20. Xu J, Wu R, Huang H, Zheng W, Ren X, Wu N, Ji B, Lv Y, Liu Y, Mi R. Computed  
433 Tomographic Imaging of 3 Patients With Coronavirus Disease 2019 Pneumonia With Negative  
434 Virus Real-time Reverse-Transcription Polymerase Chain Reaction Test. *Clinical Infectious*  
435 *Diseases* 2020.
- 436 21. Hernandez Medrano ITG, J; Belda, C; Urena, A; Salcedo, I; Espinosa-Anke, L; Saggion, H.  
437 Savana: Re-using Electronic Health Records with Artificial Intelligence. *International Journal of*  
438 *Interactive Multimedia and Artificial Intelligence* 2017: 4(7): 8-12.
- 439 22. Yang Z, Dehmer M, Yli-Harja O, Emmert-Streib F. Combining deep learning with token  
440 selection for patient phenotyping from electronic health records. *Scientific Reports* 2020:  
441 10(1): 1432.
- 442 23. The Lancet. The gendered dimensions of COVID-19. *The Lancet* 2020: 395(10231):  
443 1168.
- 444 24. Quinlan JR. Induction of decision trees. *Machine Learning* 1986: 1(1): 81-106.
- 445 25. Wynants L, Van Calster B, Bonten MMJ, Collins GS, Debray TPA, De Vos M, Haller MC,  
446 Heinze G, Moons KGM, Riley RD, Schuit E, Smits LJM, Snell KIE, Steyerberg EW, Wallisch C, van  
447 Smeden M. Prediction models for diagnosis and prognosis of covid-19 infection: systematic  
448 review and critical appraisal. *BMJ* 2020: 369: m1328.
- 449 26. Moons KG, Altman DG, Reitsma JB, Ioannidis JP, Macaskill P, Steyerberg EW, Vickers  
450 AJ, Ransohoff DF, Collins GS. Transparent Reporting of a multivariable prediction model for  
451 Individual Prognosis or Diagnosis (TRIPOD): explanation and elaboration. *Ann Intern Med* 2015:  
452 162(1): W1-73.
- 453 27. Lescure FX, Bouadma L, Nguyen D, Parisey M, Wicky PH, Behillil S, Gaymard A,  
454 Bouscambert-Duchamp M, Donati F, Le Hingrat Q, Enouf V, Houhou-Fidouh N, Valette M,  
455 Mailles A, Lucet JC, Mentre F, Duval X, Descamps D, Malvy D, Timsit JF, Lina B, van-der-Werf S,  
456 Yazdanpanah Y. Clinical and virological data of the first cases of COVID-19 in Europe: a case  
457 series. *Lancet Infect Dis* 2020.
- 458 28. Li Q, Guan X, Wu P, Wang X, Zhou L, Tong Y, Ren R, Leung KSM, Lau EHY, Wong JY, Xing  
459 X, Xiang N, Wu Y, Li C, Chen Q, Li D, Liu T, Zhao J, Liu M, Tu W, Chen C, Jin L, Yang R, Wang Q,  
460 Zhou S, Wang R, Liu H, Luo Y, Liu Y, Shao G, Li H, Tao Z, Yang Y, Deng Z, Liu B, Ma Z, Zhang Y, Shi  
461 G, Lam TTY, Wu JT, Gao GF, Cowling BJ, Yang B, Leung GM, Feng Z. Early Transmission  
462 Dynamics in Wuhan, China, of Novel Coronavirus-Infected Pneumonia. *N Engl J Med* 2020:  
463 382(13): 1199-1207.
- 464 29. McCall B. COVID-19 and artificial intelligence: protecting health-care workers and  
465 curbing the spread. *The Lancet Digital Health* 2020: 2(4): e166-e167.
- 466 30. Du RH, Liang LR, Yang CQ, Wang W, Cao TZ, Li M, Guo GY, Du J, Zheng CL, Zhu Q, Hu M,  
467 Li XY, Peng P, Shi HZ. Predictors of Mortality for Patients with COVID-19 Pneumonia Caused by  
468 SARS-CoV-2: A Prospective Cohort Study. *Eur Respir J* 2020.
- 469 31. Ayyoubzadeh SM, Ayyoubzadeh SM, Zahedi H, Ahmadi M, SRNK. Predicting COVID-19  
470 Incidence Through Analysis of Google Trends Data in Iran: Data Mining and Deep Learning Pilot  
471 Study. *JMIR Public Health Surveill* 2020: 6(2): e18828.
- 472 32. Li L, Qin L, Xu Z, Yin Y, Wang X, Kong B, Bai J, Lu Y, Fang Z, Song Q, Cao K, Liu D, Wang  
473 G, Xu Q, Fang X, Zhang S, Xia J, Xia J. Artificial Intelligence Distinguishes COVID-19 from  
474 Community Acquired Pneumonia on Chest CT. *Radiology* 2020: 200905.
- 475 33. The race against COVID-19. *Nat Nanotechnol* 2020: 15(4): 239-240.
- 476 34. Ienca M, Vayena E. On the responsible use of digital data to tackle the COVID-19  
477 pandemic. *Nat Med* 2020: 26(4): 463-464.
- 478 35. World Health Organization (WHO). Coronavirus disease 2019 (COVID-19) Situation  
479 Report –64. 2020. Available from <https://www.who.int/docs/default->

480 source/coronaviruse/situation-reports/20200324-sitrep-64-covid-19.pdf?sfvrsn=723b221e\_2  
481 Accessed March 24, 2020  
482 36. Spanish Ministry of Health. Situación de COVID-19 en España. Ministerio de Sanidad  
483 2020. Availabe from <https://covid19.isciii.es>. Accessed April 13, 2020.

484 **FIGURES and TABLES**

485

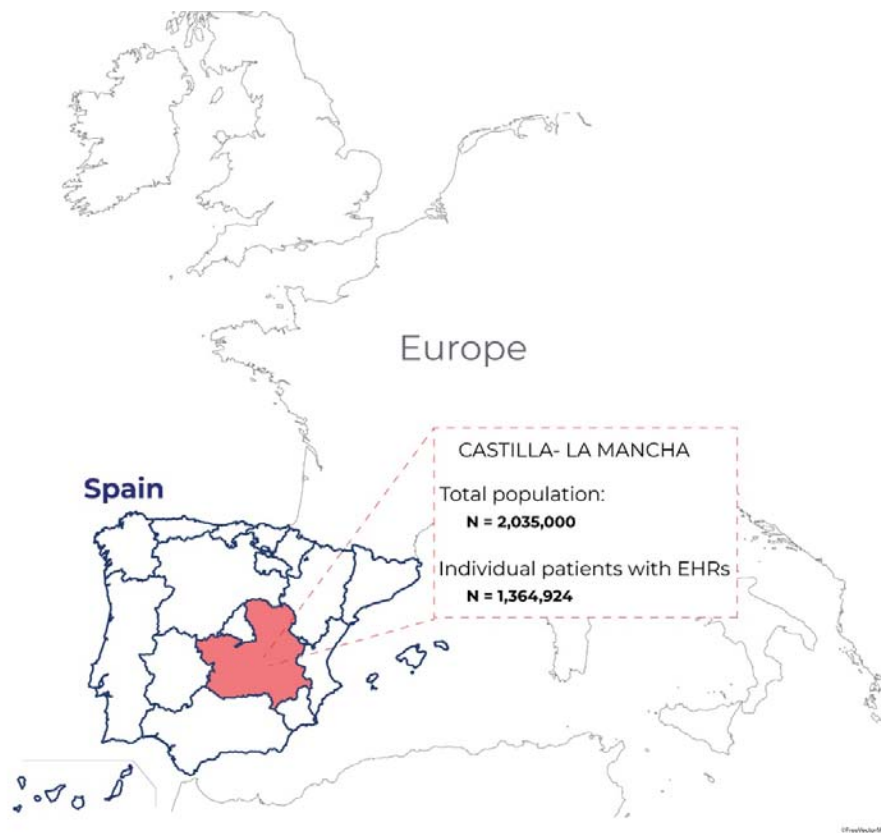

486

487

488

489 **Figure 1. Map of Castilla-La Mancha.**

490 **Footnote:** Map of Castilla-La Mancha (red) within the Spanish (blue line) and  
491 European territories. From a source general population of 2,035,000 inhabitants, we  
492 collected and analyzed the clinical information in the EHRs of 1,364,924 patients within  
493 the SESCAM Healthcare Network.

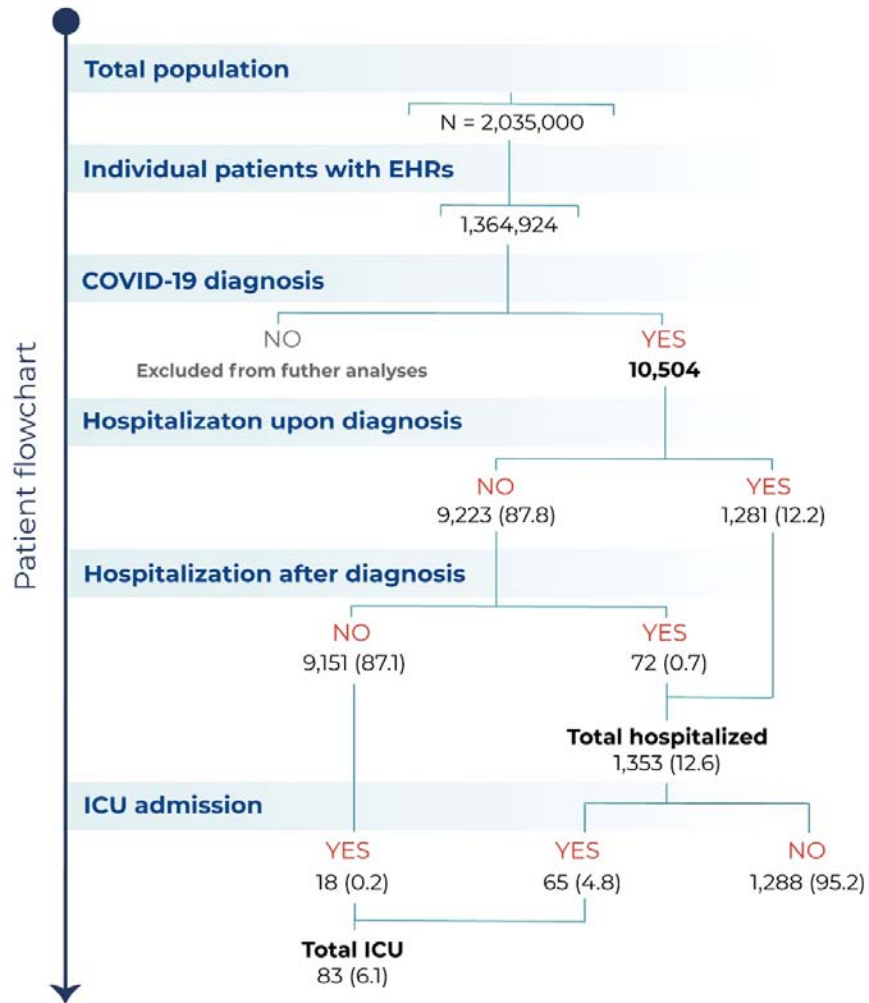

494

495 **Figure 2. Patient flowchart.**

496 **Footnote:** Flowchart depicting the total number of inhabitants in the source population,  
 497 the number (%) of patients with available EHRs analyzed, the number of patients  
 498 diagnosed with COVID-19, and of those, the number of hospitalizations and ICU  
 499 admissions.

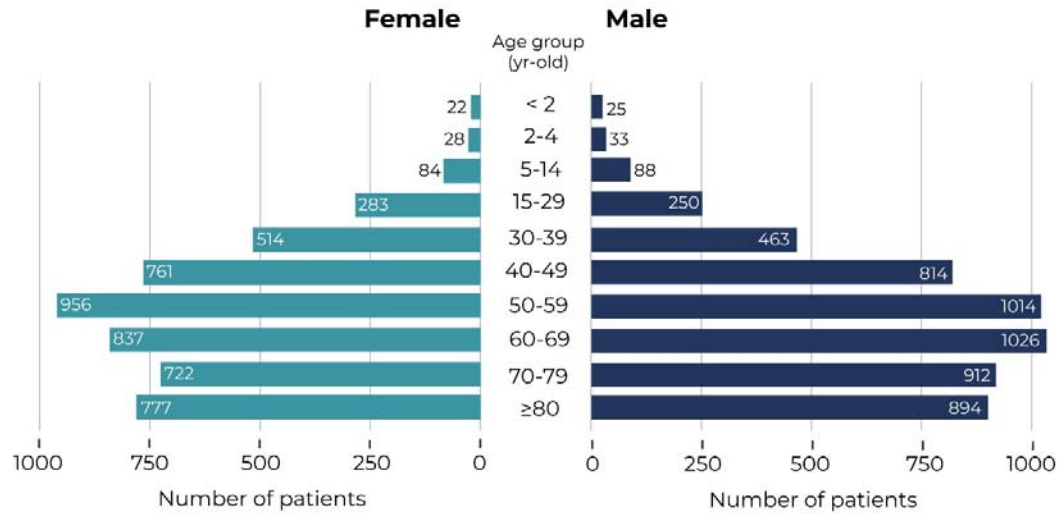

500

501 **Figure 3. Age and Sex Distribution of COVID-19 patients.**

502 **Footnote:** Age distribution of incident cases of COVID-19 in females (left) and males  
 503 (right) in the study population for the period comprised between Jan 1, 2020 and March  
 504 29, 2020.

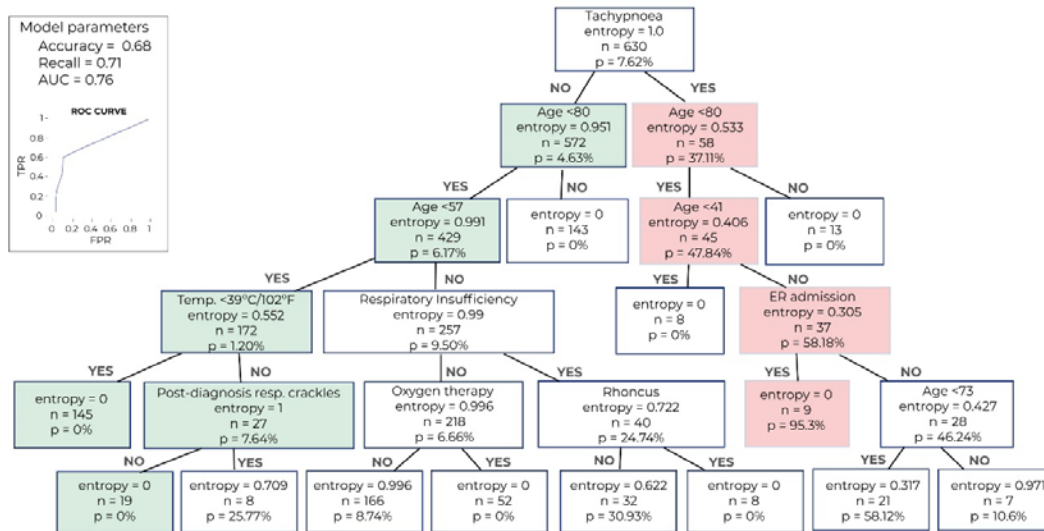

505

506 **Figure 4. Decision tree of relevant clinical variables for the prediction of ICU**  
507 **admission in COVID-19 patients.**

508 **Footnote:** The combination of three easily available clinical variables, namely age,  
509 temperature, and respiratory frequency, was the most parsimonious predictor of ICU  
510 admission among COVID-19 patients. The number of patients, probability (p) of ICU  
511 admission predicted by the model, and level of entropy (a measure indicating how  
512 mixed or pure the classification is, where 0 indicates optimal separation of classes) are  
513 indicated in each box. The green pathway indicates that those patients with no  
514 tachypnoea, younger than 56 years old, and with temperature less than 39°C/102°F  
515 (OR more than 39°C/102°F without respiratory crackles), did not require ICU  
516 admission. On the contrary, the red pathway indicates that patients aged 40-79 years,  
517 who presented with tachypnoea, and delayed their visit to the ER after being seen in  
518 primary care, were likely to be admitted in the ICU. For this model, we obtained  
519 accuracy, recall, and AUC values of 0.68, 0.71, and 0.76, respectively (top right panel).  
520 See text for further details.



521 **TABLE 1. Baseline demographics and clinical data upon diagnosis.**

|                                        | <b>Female<br/>n = 4,984</b> | <b>Male<br/>n = 5,519</b> | <b>TOTAL<br/>n = 10,504</b> | <b>p-<br/>value*</b> |
|----------------------------------------|-----------------------------|---------------------------|-----------------------------|----------------------|
| <b>Sex</b>                             |                             |                           |                             |                      |
| Female                                 |                             |                           | 4,984(47.4)                 |                      |
| Male                                   |                             |                           | 5,519(52.5)                 |                      |
| Unknown                                |                             |                           | 1(0.0)                      |                      |
| <b>Age (in years)</b>                  |                             |                           |                             |                      |
| Mean(SD)                               | 57.4(20.0)                  | 59.0(19.5)                | 58.2(19.7)                  | <0.001               |
| Median(Min-Max)                        | 58.0(0.0-100.0)             | 60.0(0.0-102.0)           | 59.0(0.0-102.0)             |                      |
| (Q1-Q3)                                | (44.0-73.0)                 | (46.0-74.0)               | (45.0-73.0)                 |                      |
| <b>Signs and Symptoms n(%)</b>         |                             |                           |                             |                      |
| Cough                                  | 2,482(49.8)                 | 2,760(50.0)               | 5,243(49.9)                 | 0.8453               |
| Fever                                  | 2,120(42.5)                 | 2,783(50.4)               | 4,904(46.7)                 | <0.001               |
| Dyspnoea                               | 1,476(29.6)                 | 1,818(32.9)               | 3,294(31.4)                 | <0.001               |
| Respiratory crackles                   | 849(17.0)                   | 1,085(19.7)               | 1,934(18.4)                 | <0.001               |
| Diarrhoea                              | 556(11.2)                   | 543(9.8)                  | 1,099(10.5)                 | 0.03                 |
| Myalgia                                | 467(9.4)                    | 451(8.2)                  | 919(8.7)                    | 0.0326               |
| Headache                               | 462(9.3)                    | 302(5.5)                  | 764(7.3)                    | <0.001               |
| Rhonchus                               | 279(5.6)                    | 414(7.5)                  | 693(6.6)                    | <0.001               |
| Chest pain                             | 287(5.8)                    | 267(4.8)                  | 554(5.3)                    | 0.039                |
| Lymphopenia                            | 196(3.9)                    | 346(6.3)                  | 542(5.2)                    | <0.001               |
| Wheezing                               | 194(3.9)                    | 195(3.5)                  | 389(3.7)                    | 0.3567               |
| Tachypnoea                             | 135(2.7)                    | 203(3.7)                  | 338(3.2)                    | 0.0059               |
| Anosmia                                | 166(3.3)                    | 134(2.4)                  | 300(2.9)                    | 0.0066               |
| Sore throat                            | 69(1.4)                     | 57(1.0)                   | 127(1.2)                    | 0.118                |
| Ageusia                                | 33(0.7)                     | 32(0.6)                   | 65(0.6)                     | 0.68                 |
| Dysphagia                              | 19(0.4)                     | 28(0.5)                   | 47(0.4)                     | 0.4119               |
| Neuralgia                              | 19(0.4)                     | 22(0.4)                   | 41(0.4)                     | 1                    |
| Splenomegaly                           | 8(0.2)                      | 14(0.3)                   | 22(0.2)                     | 0.4071               |
| Hepatomegaly                           | 2(0.0)                      | 6(0.1)                    | 8(0.1)                      | 0.3586               |
| <b>Comorbidities n(%)<sup>#</sup></b>  |                             |                           |                             |                      |
| Cardiovascular disease                 | 2,253(45.2)                 | 2,805(50.8)               | 5,058(48.2)                 | <0.001               |
| Hypertension                           | 1,552(31.1)                 | 1,975(35.8)               | 3,527(33.6)                 | <0.001               |
| Ischemic stroke                        | 91(1.8)                     | 163(3.0)                  | 254(2.4)                    | <0.001               |
| Heart Disease                          | 1100(22.1)                  | 1539(27.9)                | 2639(25.1)                  | <0.001               |
| Ischemic heart disease                 | 152(3.0)                    | 475(8.6)                  | 627(6.0)                    | <0.001               |
| Heart failure                          | 243(4.9)                    | 309(5.6)                  | 552(5.3)                    | 0.1063               |
| Diabetes                               | 689(13.8)                   | 957(17.3)                 | 1646(15.7)                  | <0.001               |
| Obesity                                | 479(9.6)                    | 457(8.3)                  | 936(8.9)                    | 0.0185               |
| Renal dysfunction                      | 271(5.4)                    | 493(8.9)                  | 764(7.3)                    | <0.001               |
| CKD                                    | 171(3.4)                    | 323(5.9)                  | 494(4.7)                    | <0.001               |
| Depression                             | 484(9.7)                    | 219(4.0)                  | 703(6.7)                    | <0.001               |
| Chronic respiratory disease            | 242(4.9)                    | 646(11.7)                 | 888(8.5)                    | <0.001               |
| Asthma                                 | 496(10.0)                   | 263(4.8)                  | 759(7.2)                    | <0.001               |
| COPD                                   | 126(2.5)                    | 549(9.9)                  | 675(6.4)                    | <0.001               |
| Obstructive sleep apnea syndrome (OSA) | 69(1.4)                     | 143(2.6)                  | 212(2.0)                    | <0.001               |
| Bronchiectasis                         | 42(0.8)                     | 87(1.6)                   | 129(1.2)                    | <0.001               |
| Chronic Liver Disease                  | 36(0.7)                     | 75(1.4)                   | 111(1.1)                    | 0.002                |
| Cirrhosis                              | 16(0.3)                     | 35(0.6)                   | 51(0.5)                     | 0.0304               |
| HIV                                    | 12(0.2)                     | 22(0.4)                   | 34(0.3)                     | 0.2113               |

522 **Footnote:** \*p-values from Yates-corrected chi<sup>2</sup> test on percentage difference of female vs. male COVID-19 patients. All  
523 tests were performed individually for each variable (comorbidity or sign/symptom, where applicable). For numerical  
524 values (i.e., age), t-tests of difference between means were used. <sup>#</sup>List of medical conditions according to SNOMED CT  
525 terminology.

527  
528

**TABLE 2. Association between ICU admission and comorbidities/signs and symptoms upon diagnosis in patients with COVID-19.**

| COMORBIDITIES               |             |          |          | SIGNS AND SYMPTOMS   |             |          |          |
|-----------------------------|-------------|----------|----------|----------------------|-------------|----------|----------|
| Condition <sup>#</sup>      | No ICU n(%) | ICU n(%) | p-value* | Sign or Symptom      | No ICU n(%) | ICU n(%) | p-value* |
| Diabetes                    | 1613(15.5)  | 33(39.8) | <0.001   | Cough                | 5181(49.7)  | 62(74.7) | <0.001   |
| Obesity                     | 917(8.8)    | 19(22.9) | <0.001   | Fever                | 4849(46.5)  | 55(66.3) | <0.001   |
| Chronic respiratory disease | 883(8.5)    | 5(6)     | 0.548    | Dyspnoea             | 3246(31.1)  | 48(57.8) | <0.001   |
| COPD                        | 673(6.5)    | 2(2.4)   | 0.2029   | Respiratory crackles | 1904(18.3)  | 30(36.1) | <0.001   |
| Asthma                      | 750(7.2)    | 9(10.8)  | 0.2868   | Myalgia              | 908(8.7)    | 11(13.3) | 0.2066   |
| OSA                         | 211(2)      | 1(1.2)   | 0.8908   | Diarrhoea            | 1084(10.4)  | 15(18.1) | 0.0363   |
| Bronchiectasis              | 129(1.2)    | 0(0)     | 0.6033   | Dysphagia            | 47(0.5)     | 0(0)     | 1        |
| Cardiovascular disease      | 4998(48)    | 60(72.3) | <0.001   | Wheezing             | 383(3.7)    | 6(7.2)   | 0.1568   |
| Hypertension                | 3487(33.5)  | 40(48.2) | 0.0066   | Tachypnoea           | 311(3)      | 27(32.5) | <0.001   |
| Ischemic stroke             | 253(2.4)    | 1(1.2)   | 0.716    | Chest pain           | 546(5.2)    | 8(9.6)   | 0.1237   |
| Heart Disease               | 2604(25)    | 35(42.2) | <0.001   | Lymphopenia          | 524(5)      | 18(21.7) | <0.001   |
| Ischemic Heart Disease      | 616(5.9)    | 11(13.3) | 0.0099   | Headache             | 757(7.3)    | 7(8.4)   | 0.8442   |
| Heart failure               | 548(5.3)    | 4(4.8)   | 1        | Rhonchus             | 676(6.5)    | 17(20.5) | <0.001   |
| Renal dysfunction           | 748(7.2)    | 16(19.3) | <0.001   | Hepatomegaly         | 8(0.1)      | 0(0)     | 1        |
| CKD                         | 488(4.7)    | 6(7.2)   | 0.4059   | Anosmia              | 297(2.9)    | 3(3.6)   | 0.9317   |
| Chronic Liver Disease       | 109(1)      | 2(2.4)   | 0.502    | Ageusia              | 65(0.6)     | 0(0)     | 0.9847   |
| Cirrhosis                   | 51(0.5)     | 0(0)     | 1        | Neuralgia            | 41(0.4)     | 0(0)     | 1        |
| Depression                  | 699(6.7)    | 4(4.8)   | 0.6418   | Sore throat          | 126(1.2)    | 1(1.2)   | 1        |
| HIV                         | 33(0.3)     | 1(1.2)   | 0.6536   | Splenomegaly         | 21(0.2)     | 1(1.2)   | 0.4317   |

529  
530  
531

**Footnote:** \*p-values from Yates-corrected  $\chi^2$  test of difference between percentage of patients in either outcome group. All tests were performed individually for each variable (comorbidity or sign/symptom, where applicable). <sup>#</sup>List of medical conditions according to SNOMED CT terminology.
